# Supplementary material
Source: Frontiers journal article supplement (https://www.frontiersin.org/articles/1450796)
Supplement: Table_1.xlsx [file Table_1.xlsx]

## Sheet: Table S1
Table S1 Genomic profile of the patient.
Sequencing results using DNA samples
Gene	Transcript	Exon	Nucleotide	Amino acid	Mutant allele frequency	Variant
						type
BRCA2 (Germline)	NM_000059	11	c.6836T>G	p.L2279*	Likely pathogenic
AXIN1	NM_003502	9	c.2215C>T	p.R739C	4.70%	III
CREBBP	NM_004380	30	c.5117C>T	p.T1706I	6.52%	III
CTNNB1	NM_001904	3	c.133T>G	p.S45A	5.73%	II
ERCC2	NM_000400	18	c.1704_1707del	p.F568fs	7.98%	II
EZR	NM_003379	11	c.1310G>A	p.R437H	6.11%	III
KMT2D	NM_003482	35	c.10296G>T	p.L3432F	4.81%	III
MAP2K4	NM_001281435	9	c.874C>T	p.R292*	1.15%	III
MSH6	NM_000179	4	c.2561A>T	p.K854M	3.82%	III
NF2	NM_000268	6	c.586C>T	p.R196*	1.25%	II
PTPRD	NM_002839	24	c.2000C>T	p.S667L	6.91%	III
PTPRT	NM_133170	8	c.1238C>T	p.A413V	11.45%	III
RTEL1	NM_032957	29	c.2882C>G	p.P961R	2.15%	III
SLC34A2	NM_006424	7	c.815_816del	p.T272fs	5.27%	III
SLC34A2	NM_006424	13	c.2013_2015del	p.S671del	34.81%	III
UMPS	NM_000373	4	c.1088G>A	p.R363Q	4.00%	III
According to the "Standards and Guidelines for the Interpretation and Reporting of Sequence Variants in Cancer" jointly published by ASCO, AMP, and CAP in 2017, the variants are classified into three types based on the variant and the level of evidence:
II: These are gene variants that have potential clinical significance in terms of treatment, prognosis, or diagnosis.	III: These are gene variants with unknown clinical significance in terms of treatment, prognosis, or diagnosis, or variants that have never been reported in any cancer.
